## Dietary Intake by Diabetic Status

### Differences in Dietary Intake Exist Among U.S. Adults by Diabetic Status Using NHANES 2009-2016

1 **Luotao Lin<sup>1</sup>, Fengqing Zhu<sup>2</sup>, Edward J. Delp<sup>2</sup>, Heather A. Eicher-Miller<sup>1\*</sup>**

2  
3 <sup>1</sup>Department of Nutrition Science, Purdue University, West Lafayette, IN, United States;  
4 <sup>2</sup>School of Electrical and Computer Engineering, Purdue University, West Lafayette, IN, United  
5 States.

6  
7 **\*Correspondence:**  
8 Heather Eicher-Miller  
9 heicherm@purdue.edu

10  
11 Number of words: 3557  
12 Number of tables: 8

13  
14 **Keywords: insulin takers, food frequency, energy contribution, food category, diet choice,**  
15 **diabetes.**

16  
17 **Abstract**  
18 Objectives:  
19 Insulin takers' diets have rarely been described although insulin dosing is highly dependent on  
20 dietary intake. The objective of this paper was to determine the most frequently consumed food  
21 or beverage items, food subcategories, and food categories, and those that contributed most to  
22 total energy intake among U.S. insulin takers, those with type 2 diabetes (T2D) not taking insulin  
23 and those without diabetes; the groups were also compared at the broad food category level.

24 Methods:  
25 The Laboratory tests and questionnaires of the NHANES 2009–2016 classified 774 insulin  
26 takers, 2,758 T2D not taking insulin, and 17,796 participants without diabetes. USDA assigned  
27 8-digit food codes identifying each food item and its membership to a category and subcategory  
28 of foods were used to categorize foods based on the WWEIA categories. Raw and weighted  
29 frequency and energy contributions of each food item, food subcategory, and food category were  
30 calculated and ranked. Comparisons among groups by broad food category used the Rao–Scott  
31 modified chi-square test.

32 Results:  
33 Diet soft drinks ranked as the 4<sup>th</sup> and 7<sup>th</sup> most consumed food subcategory in insulin takers and  
34 T2D not taking insulin, respectively. Soft drinks ranked as the 8<sup>th</sup> and 6<sup>th</sup> most consumed food  
35 subcategory in T2D not taking insulin and those without diabetes, and contributed 5<sup>th</sup> and 2<sup>nd</sup>  
36 most to energy, respectively. Protein foods represented 4 of the top 10 highest energy  
37 contributing food subcategories among insulin takers, 3 of the top 10 food subcategories among  
38 those with T2D not taking insulin, and only 1 subcategory among those without diabetes. Insulin  
39 takers had higher consumption frequency of grains, and lower consumption frequency of sweets  
40 and alcohol, and a larger share of energy comprising protein, vegetables, and grains, and a  
41 smaller share of energy comprising beverages and alcohol compared to participants without  
42 diabetes.

43 Conclusions:

## Dietary Intake by Diabetic Status

44 Differences in dietary intake exist among U.S. adults by diabetic status. Insulin takers are likely  
45 to consume more protein foods and less regular soft drinks compared to other 2 groups. Lists of  
46 the most frequently reported foods and foods contributing most to energy may be helpful for  
47 nutrition education, prescribing diets, and digital-based dietary assessment for insulin takers.

48

### 49 **1 Introduction**

50 Diabetes is a chronic disease highly influenced by diet where individuals either do not produce  
51 enough insulin to regulate blood glucose level or they are not able to use the insulin they produce  
52 to effectively move blood glucose into body cells (1). Over time, diabetes can cause additional  
53 serious health problems including heart disease, vision loss, and kidney disease. About 34.2  
54 million U.S. individuals (10.5% of the U.S. population) diabetes including type 1 (T1D), type 2  
55 (T2D), and gestational diabetes in 2020 (2).

56 Both those with T1D and T2D may use injectable or oral insulin to control their blood glucose  
57 levels. Proper insulin dosing to control blood glucose levels and reduce risk of severe  
58 consequences is dependent on dietary intake, particularly the frequency and energy from  
59 macronutrients: carbohydrate, protein, and fat (3,4). Thus, quantification of the foods comprising  
60 dietary intake may be used to inform insulin dosing algorithms to enhance blood glucose level  
61 control (5,6) and knowledge of the foods comprising overall dietary intake may also aid the  
62 creation of meal plans, inform substitutions, and other interventions. Furthermore, it is likely that  
63 diabetes status may differentiate food and beverage choice and intake among those using insulin,  
64 T2D not using insulin, and those without diabetes as one strategy for glucose control is through  
65 the avoidance of certain foods and monitored intake of carbohydrates, for example sugar-  
66 sweetened soft drinks (7). However, very little information on the food intake of those taking  
67 insulin or those with T2D not taking insulin is available (8–10).

68 Therefore, the objectives of this study were to (1) determine the most frequently consumed food  
69 items, food subcategories, and food categories and the food items, food subcategories, and food  
70 categories that contributed most to energy intake, and (2) compare the differences of the most  
71 frequently consumed broad food categories and the broad food categories that contributed most  
72 to energy intake among insulin takers, T2D participants not taking insulin, and participants  
73 without diabetes among U.S. adults aged 18 years old or older using data from the National  
74 Health And Nutrition Examination Survey (NHANES) 2009–2016.

### 75 **2 Materials and methods**

#### 76 **2.1 Participants and Dataset**

77 NHANES is a cross-sectional survey that is conducted by the National Center for Health  
78 Statistics (NCHS) of the U.S. Centers for Disease Control and Prevention to assess the health  
79 and nutritional status of the non-institutionalized civilian population in the U.S. (11).

80 Participants' sociodemographic information was obtained via questionnaires during the in-person  
81 household interview, which included age, sex, race/ethnicity, and poverty to income ratio (PIR).  
82 The NCHS Research Ethics Review Board approved the survey and all participants consented to  
83 participate (12).

#### 84 **2.2 Analytic Sample**

85 NHANES 2009-2016 was used to include the most recent available dietary data and sufficient  
86 sample size. Adults in the United States aged 18 or older who had a reliable first 24-hour dietary  
87 recall, reliable laboratory test results, and valid answers to diabetic-related questions made up the  
88 analytic sample.

## Dietary Intake by Diabetic Status

89 NHANES diabetic-related questions and laboratory test results were used to divide the sample  
90 into three groups: insulin takers, participants with diabetes not taking insulin, and participants  
91 without diabetes. The number of insulin takers was determined by the question “Are you/ is the  
92 sample person now taking insulin?” Those participants with diabetes who were not taking  
93 insulin were identified by subtracting those using insulin from the total number of participants  
94 with diabetes. Diabetes was classified by self-reporting being told they had diabetes by a doctor  
95 or taking medications that lowered glucose, or by fasting plasma glucose concentration  $\geq 126$   
96 mg/dL or hemoglobin A1c  $\geq 6.5\%$  (13). Since T1D was classified when a participant reported  
97 being diagnosed with diabetes before the age of 30 years old and reporting continuous insulin  
98 use since diagnosis (14), insulin takers encompass all those with T1D, so participants with  
99 diabetes not taking insulin is equal to participants with T2D not taking insulin. Those  
100 participants without diabetes were identified by subtracting the number of participants with  
101 diabetes from the sample. As a result, the study sample included 774 insulin takers, 2,758 T2D  
102 who did not use insulin, and 17,796 participants who did not have diabetes.

### 103 **2.3 Sociodemographic characteristics**

104 Sociodemographic characteristics included survey year (2009-2010, 2011-2012, 2013-2014, and  
105 2015-2016) and self-reported sex (male or female), race/ethnicity (grouped as Hispanic, non-  
106 Hispanic white, non-Hispanic black, and other including multi-race), age (grouped as 18-34, 35-  
107 49, and 50-80 years), and PIR which was the reported household income divided by the federal  
108 poverty guideline for household income, and grouped as 0-0.99 (below poverty threshold), 1-  
109 1.99, 2-2.99, 3-3.99, and 4- 5 (15).

### 110 **2.4 Dietary Assessment**

111 The USDA Automated Multiple-Pass Method (16) was used to collect a dietary recall recorded  
112 during the physical health examination where participants reported all of the foods consumed  
113 during the previous 24-hour period, including information on the time of intake, amount and type  
114 of each food, and detailed food descriptions (17). Each reported food item was then linked to the  
115 USDA’s Food and Nutrient Database for Dietary Studies (FNDDS) (18–21) to assign an 8-digit  
116 food codes. The USDA food codes were also used to sort the reported foods into the What We  
117 Eat in America food categories and subcategories (22).

### 118 **2.5 Statistical Analysis**

119 The Rao-Scott modified chi-square test was used to compare sociodemographic variables created  
120 from the survey data among the three groups.

121 The weighted frequencies of reported foods were computed by determining the weighted sum of  
122 the number of food items, food subcategories, and food categories:

$$123 \sum_{i=1}^n (R_i W_i)$$

124 where  $n$ = the sample size,  $i$ = each participant,  $R_i$ = # of reports of individual food code for the  $i^{\text{th}}$   
125 participant,  $W_i$ = dietary day 1 sample weight for the  $i^{\text{th}}$  participant (23,24). The number of  
126 reports of foods for each participant was multiplied by the dietary day 1 sample weight, and then  
127 summed to yield the total weighted frequency of the particular food or beverage for each  
128 respective group, which represented how often that food or beverage was consumed by the  
129 respective group in the U.S. in one day. The weighted frequency of the food or beverage was  
130 also divided by the total weighted frequency of all foods or beverages reported in a single day to  
131 get the weighted percent of the frequency of that food or beverage being consumed out of all  
132 reported foods and beverages consumed.

## Dietary Intake by Diabetic Status

133 The weighted energy contribution of reported foods items, food subcategories, and food  
134 categories were computed by determining the weighted sum as:

$$135 \sum_{i=1}^n (E_i W_i)$$

136 where n= the sample size, i= each participant  $E_i$  =total energy for an individual food code for the  
137  $i^{\text{th}}$  participant,  $W_i$ = dietary day 1 sample weight for the  $i^{\text{th}}$  participant (23,24). The energy  
138 contributed by a particular food or beverage was first summed for each participant and then  
139 multiplied by the dietary day 1 sample weight of the participant, then summed for all participants  
140 in the sample for each group, which represented how much energy that food or beverage  
141 contributed to the total energy for the respective group in the U.S. in one day. The weighted  
142 energy of the particular food or beverage was also divided by the total weighted energy from all  
143 reported foods and beverages to get the weighted percent of energy from that food or beverage  
144 out of the energy estimated from all reported foods and beverages.

145 The Rao-Scott modified chi-square goodness-of-fit tests were used to compare the frequency and  
146 energy contribution comparisons of food terms among the three groups. Significant differences  
147 were indicated as when  $p < 0.05/42$  or  $p < 0.0012$  using a Bonferroni type adjustment for  
148 multiple comparisons for food intake among 14 broad food categories  $\times$  3 groups. Survey  
149 weights, or the reciprocal of sample inclusion probability, were used in all computations to allow  
150 for inference to the non-institutionalized U.S. population. Further adjustments were performed to  
151 account for the clustering and stratification inherent to the survey design. All analyses were  
152 completed in SAS 9.4 (SAS Institute Inc).

### 153 **3 Results**

#### 154 **3.1 Sociodemographic characteristics**

155 The sociodemographic characteristics of participants taking insulin, with T2D not taking insulin,  
156 and participants without diabetes are shown in **Table 1**. Sex, age, race/ethnicity, and PIR were  
157 significantly different among the three groups.

158 Most insulin takers and those with T2D who were not using insulin were ages 50 to 80 years.

159 Participants without diabetes were more evenly distributed in three age groups (18-34, 35-49, 50-  
160 80). About half of the group using insulin and with T2D but not taking insulin had PIR <2,  
161 furthermore, 28.1% of insulin takers had PIR below the poverty threshold (PIR<1). The group  
162 without diabetes had higher incomes with more than 25% of participants having a PIR greater  
163 than 4.

#### 164 **3.2 The most frequently consumed food items, food subcategories, and food categories**

165 The top 10 most frequently reported food items, food subcategories, and food categories for  
166 insulin takers, those with T2D not using insulin, and participants without diabetes are shown in  
167 **Tables 2-4**. Foods are presented in descending weighted frequency order by their FNDDS short  
168 food descriptions. In frequency lists, 7 food items (Table 2), 6 food subcategories (Table 3), and  
169 8 food categories (Table 4) are common across the three groups but their rankings were varied.  
170 Notably, diet soft drink was the 4<sup>th</sup> most frequently consumed food subcategory among insulin  
171 takers, the 7<sup>th</sup> among those with T2D not taking insulin, and did not appear in the top 10 food  
172 subcategory frequency list among those without diabetes (Table3). Regular soft drink did not  
173 appear in the top 10 food subcategory frequency list for insulin takers, but was the 8<sup>th</sup> most  
174 frequently consumed food subcategory among those with T2D not taking insulin, and the 6<sup>th</sup>  
175 most frequently consumed food subcategory among participants without diabetes (Table3).

#### 176 **3.3 The highest energy contributing food items, food subcategories, and food categories**

## Dietary Intake by Diabetic Status

177 The top 10 highest energy contributing food items, food subcategories, and food categories for  
178 insulin takers, T2D not using insulin, and participants without diabetes are shown in **Tables 5-7**.  
179 Foods are presented in descending weighted order according to their energy contribution by their  
180 FNDDS short food descriptions. In energy contribution lists, 5 food items (Table 5), 6 food  
181 subcategories (Table 6), and 5 food categories (Table 7) were similar among the three groups but  
182 their rankings were different. Regular soft drinks did not rank in the top 10 most energy  
183 contributing food subcategories list among insulin takers, but was ranked 5<sup>th</sup> among those with  
184 T2D who did not use insulin, and 2<sup>nd</sup> among participants without diabetes (Table 6).  
185 Furthermore, insulin takers consumed less energy from food subcategories with added sugars  
186 compared with the other two groups (cakes and pies were 6<sup>th</sup> and cookies and brownies 7<sup>th</sup>  
187 among insulin takers; cakes and pies were 3<sup>rd</sup> and cookies and brownies 6<sup>th</sup> among those with  
188 T2D not taking insulin; cookies and brownies were 8<sup>th</sup> and cakes and pies 9<sup>th</sup> among participants  
189 without diabetes). More protein food subcategories ranked high within the top 10 list (whole  
190 pieces of chicken ranked 3<sup>rd</sup> place, eggs and omelets ranked 4<sup>th</sup> place, meat mixed dishes ranked  
191 5<sup>th</sup> place, cold cuts and cured meats ranked 10<sup>th</sup> place) among insulin takers compared to the  
192 other two groups (whole pieces of chicken ranked 4<sup>th</sup> place, eggs and omelets 9<sup>th</sup> place, meat  
193 mixed dishes 10<sup>th</sup> place in those with T2D not using insulin, and whole pieces of chicken ranked  
194 5<sup>th</sup> place in participants without diabetes) (Table 6).

### 195 **3.4 Broad Food Categories Intake by Frequency and Energy Contribution**

196 The results of the comparison of the frequency and energy contribution of the broad WWEIA  
197 food or beverage categories among the three groups are shown in **Table 8**. Broad categories of  
198 grains and alcohol were statistically significantly different in both intake frequency and energy  
199 contribution across the three groups. From insulin takers to T2D not using insulin to participants  
200 without diabetes, grains exhibited a decreasing trend in consumption frequency and energy  
201 contribution, while alcohol showed an increasing trend. Snacks / sweets were statistically  
202 significantly different in consumption frequency among the three groups, which showed an  
203 increasing trend from insulin takers to T2D not using insulin to participants without diabetes.  
204 Protein foods, vegetables, beverages, water, and other were statistically significantly different in  
205 energy contribution across the three groups. From insulin takers to participants without diabetes,  
206 protein foods and vegetables exhibited a decreasing trend in energy contribution, while  
207 beverages, water, and other showed an increasing trend.

## 208 **4 Discussion**

209 Previously, few studies have investigated the diet of insulin takers (8–10) nor included  
210 consideration of intake contributions by both energy and frequency. To our knowledge, this is  
211 the first study to investigate and compare the diets of insulin takers, those who have T2D but do  
212 not use insulin, and participants without diabetes. Participants with varying diabetes and insulin  
213 using status showed significant differences in both the frequency of which certain foods or  
214 beverages are consumed and the energy contributions attributed to certain foods or beverages,  
215 implying that insulin using status may be linked to dietary behaviors and the importance of  
216 certain foods or beverages in the overall diet. In some broad WWEIA food categories, the  
217 statistically significant differences observed in the frequency were also observed in energy  
218 contribution. Both consumption frequency and energy contribution of grains (wheat bread) and  
219 alcoholic beverages (beer) were statistically significantly different among the three groups.  
220 The results also included statistically significant findings where either frequency or energy  
221 contribution differed among the groups but not both. Beverages, water, and the “other” (nutrition  
222 powder) broad food categories did not exhibit significantly different frequency of intake across

## Dietary Intake by Diabetic Status

223 the three groups, but the share of energy contributed by these broad food categories was lower  
224 among insulin takers compared to participants without diabetes. The share of energy contributed  
225 by protein (eggs and omelets, cold cuts and cured meats) and vegetables (tomatoes and lettuce)  
226 was also greater among insulin takers compared with participants without diabetes. Snacks /  
227 Sweets had lower consumption frequency among insulin takers compared with participants  
228 without diabetes, but the energy intake was not significantly different across all three groups.  
229 In this study, insulin takers exhibited a pattern of “higher diet quality” regarding the foods they  
230 consumed frequently and that contributed most to energy compared to those with T2D not using  
231 insulin and participants without diabetes. Since older adults accounted for the majority of the  
232 insulin takers, this finding is consistent with previous studies showing that older adults have  
233 higher-quality diets (10,23,25,26). In addition, that insulin takers have a higher diet quality is  
234 also supported by a previous study (10), suggesting that those with diabetes who are using  
235 insulin engage in dietary behaviors promoting a more healthful mix of dietary intake compared  
236 with those who do not have diabetes and those with T2D. The group using insulin reported a  
237 higher consumption frequency of grains, energy contribution from grains, protein foods and  
238 vegetables; and lower consumption frequency of alcohol and sweets/snacks and energy  
239 contributed by beverages and alcohol compared to participants without diabetes. One explanation  
240 is that grains, protein foods, and vegetables have been promoted as foods to consume to help  
241 manage blood glucose control for those taking insulin. Carbohydrate intake is highly related to  
242 postprandial glycemia, whole grains are a source of carbohydrates that have a favorable  
243 influence on postprandial blood glucose levels (27). Protein foods may also aid dietary  
244 compliance and weight loss maintenance, which is beneficial for diabetes (28,29). Vegetables  
245 consumption has been associated with the improvement of diabetes due to benefits offered by the  
246 bioactive compounds comprising them including dietary fiber, resistant starch, antioxidant  
247 vitamins, and minerals (30–32), which may explain why insulin takers select a higher percentage  
248 of their calories from vegetables compared with those who do not have diabetes. Furthermore,  
249 alcohol, sweets/snacks, and beverages (heavily influenced by sweetened beverages) are foods  
250 that those taking insulin may try to avoid due to their negative impact on glycemic control. These  
251 foods that may add solid fats or added sugars and intake among all Americans should be reduced  
252 according to the Dietary Guidelines for American, 2020-2025 (33,34). Previous studies found  
253 that those with diabetes drink less alcohol compared to those without diabetes (35,36), which  
254 supports the findings here that those who used insulin and those with T2D not taking insulin,  
255 consumed less alcohol than participants without diabetes. Even though the long-term effect of  
256 alcohol consumption on glycemic management remains to be investigated (37), heavy alcohol  
257 consumption is associated with an increased incidence of diabetes (37) and alcohol consumption  
258 may be a negative indicator of diabetes self-care behavior (38). The findings related to lower  
259 frequency of sweets/snacks and beverages among those using insulin compared to those without  
260 diabetes is supported by a previous study where participants with diabetes consumed lower  
261 amounts of sweets and beverage (juice) compared to those without diabetes (36). Sweets/snacks  
262 and beverages especially sweetened beverages that heavily add to energy intake, are typically  
263 high in added sugar. Added sugar intake is not only a significant contributor to weight gain that  
264 can lead to increased risk of diabetes, but also increased dietary glycemic load and fructose  
265 metabolism that leads to inflammation and insulin resistance (39). However, it should be noted  
266 that the literature reviewed here includes studies focused on those with diabetes, not specifically  
267 those using insulin, due to the extremely limited evidence of dietary intake among those using

## Dietary Intake by Diabetic Status

268 insulin (31,32,36). Therefore, the findings here should be further explored among those taking  
269 insulin.

270 Limitations of this analysis may be due to the aggregation of foods to subcategories and  
271 categories that may obscure specific food items or types of food that could be responsible for  
272 much of the differences among groups. The addition or removal of specific foods or beverages  
273 from a food category has the potential to change statistically significant comparisons so the  
274 results and interpretation should be viewed as one perspective on the dietary intake among these  
275 three groups keeping in mind that analysis of alternative food categorization, splitting to  
276 subcategories or itemization may yield differential results. However, the application of the  
277 WWEIA food categories lends standardization and consistency with other reporting by USDA  
278 and other researchers (40–42). In addition, the ranking lists (table 2-7) were generated from the  
279 foods and beverages reported over all times of the day, so separating out the most frequently  
280 consumed foods and foods that highly contributed to energy intake for different times or meals  
281 of the day may be helpful to inform interventions or dosing algorithms as the timing of dietary  
282 intake and combinations of foods consumed at the same time influences glucose metabolism  
283 (43–47). Furthermore, the NHANES dietary data this study used is only a one-day dietary recall  
284 of the participants, which may not be accurate due to participants' memory and may not  
285 represent the usual dietary intake (48). Moreover, misreported dietary intake may have been  
286 presented in this study sample resulting in errors in energy, frequency, food item, subcategory,  
287 and category representation and comparisons (49). Those with diabetes and insulin takers may  
288 exhibit different patterns of misreporting compared with other population groups (36). Previous  
289 studies have shown that dietary intake misreporting and especially underreporting is more  
290 prevalent in overweight and obese individuals compared to normal weight individuals (50–52),  
291 and prevalence of underreporting in diabetic patients may be even higher (53), considering that  
292 obesity is a risk factor of diabetes that 81% of diabetic patients are obese (54). Another previous  
293 study pointed out that energy misreports are prone to misreport foods that highly contributed to  
294 glycemic index and glycemic load such as underreporting foods including sugars, cookies, and  
295 milk products and overreporting foods including fruit and vegetables (52). For future study, the  
296 differences in misreporting by diabetic status should be evaluated.

297 There are several implications and applications for the results of this study. Diabetes is a chronic  
298 disease that is highly related to diet (55). The lists of foods generated in this study may be used  
299 to fill the gap in knowledge of the diets of U.S. adult insulin takers or diabetic patients (8,9),  
300 specifically, menus and dietary interventions developed to improve diabetes management may be  
301 informed by the lists. Although frequently consumed foods and those contributing most to  
302 energy may not satisfy the preferences of every person, they are generally accepted as indicated  
303 by their selection in the population. Those using insulin may be more likely to adhere to a diet  
304 they accept, thus forming healthier eating habits. Second, the findings of this study may inform  
305 future studies to gain a greater knowledge of the diets of those using insulin. For example, the  
306 list of frequently consumed foods and those most contributing to energy may inform the  
307 prioritization of foods and beverages to include in food frequency questionnaires. Third, the  
308 findings of this study may aid the development of nutrition assessment tools as researchers  
309 should concentrate efforts on developing the most accurate identification methods for the foods  
310 and beverages that are consumed the most frequently and contribute the most to total energy  
311 intake in the group they are tailored for (23).

## 312 **5 Conclusions**

## Dietary Intake by Diabetic Status

313 Differences in dietary intake exist among U.S. adults by diabetic status using NHANES 2009-  
314 2016. Insulin takers consumed grains more frequently, while consuming snack/sweet and alcohol  
315 less frequently compared to participants without diabetes. Protein, grains, and vegetables  
316 contributed more to insulin takers' daily total energy intake compared to participants without  
317 diabetes, whereas beverage and alcohol contributed less. Frequently consumed foods and those  
318 contributing to energy may inform diabetes control and management, tailored food recipe,  
319 consumer education, questionnaire design, and dietary assessment.

320

### 321 **6 Conflict of interest**

322 The authors declare that the research was conducted in the absence of any commercial or  
323 financial relationships that could be construed as a potential conflict of interest.

324

### 325 **7 Author Contributions**

326 HAE-M and LL designed research. LL analyzed data and drafted the manuscript. HAE-M, FZ,  
327 and ED critically reviewed and edited the manuscript. HAE-M had primary responsibility for  
328 final content. All authors read and approved the final manuscript.

329

### 330 **8 Funding**

331 This study was supported by Eli Lilly and Company.

332

333

334

335

336

337

338

339

340

341

342

343

344

345

346

347

348

349

350

351

352

353

354

355

356

357

358



## Dietary Intake by Diabetic Status

359 Reference:

- 360 1. Centers for Disease Control and Prevention. What is Diabetes? (2020).  
361 <https://www.cdc.gov/diabetes/basics/diabetes.html> [Accessed July 14, 2021].
- 362 2. Centers for Disease Control and Prevention. National Diabetes Statistics Report (2020).  
363 <https://www.cdc.gov/diabetes/pdfs/data/statistics/national-diabetes-statistics-report.pdf>  
364 [Accessed July 14, 2021].
- 365 3. Centers for Disease Control and Prevention. The Insulin Resistance – Diabetes Connection  
366 (2020). <https://www.cdc.gov/diabetes/basics/insulin-resistance.html> [Accessed July 14,  
367 2021].
- 368 4. Centers for Disease Control and Prevention. Types of Insulin (2021).  
369 <https://www.cdc.gov/diabetes/basics/type-1-types-of-insulin.html> [Accessed July 14, 2021].
- 370 5. Joslin EP, Kahn CR. Joslin's Diabetes Mellitus. Lippincott Williams & Wilkins (2005).  
371 1244 p.
- 372 6. Gillespie SJ, Kulkarni KD, Daly AE. Using Carbohydrate Counting in Diabetes Clinical  
373 Practice. *J Am Diet Assoc* (1998) 98(8):897 – 905.
- 374 7. Schulze MB, Manson JE, Ludwig DS, Colditz GA, Stampfer MJ, Willett WC, et al. Sugar-  
375 Sweetened Beverages, Weight Gain, and Incidence of Type 2 Diabetes in Young and  
376 Middle-Aged Women. *JAMA* (2004) 292(8):927 – 34.
- 377 8. McClure ST, Schlechter H, Oh S, White K, Wu B, Pilla SJ, et al. Dietary intake of adults  
378 with and without diabetes: results from NHANES 2013 – 2016. *BMJ Open Diabetes Res*  
379 *Care* (2020) 8(1):e001681.
- 380 9. Maffeis C, Tomasselli F, Tommasi M, Bresadola I, Trandev T, Fornari E, et al. Nutrition  
381 habits of children and adolescents with type 1 diabetes changed in a 10 years span. *Pediatr*  
382 *Diabetes*. (2020) 21(6):960 – 8.
- 383 10. Muñoz-Pareja M, León-Muñoz LM, Guallar-Castillón P, Graciani A, López-García E,  
384 Banegas JR, et al. The Diet of Diabetic Patients in Spain in 2008 – 2010: Accordance with  
385 the Main Dietary Recommendations—A Cross-Sectional Study. *PLOS ONE* (2012)  
386 7(6):e39454.
- 387 11. Centers for Disease Control and Prevention. NHANES - National Health and Nutrition  
388 Examination Survey Homepage (2021). <https://www.cdc.gov/nchs/nhanes/index.htm>  
389 [Accessed July 14, 2021].
- 390 12. Centers for Disease Control and Prevention. NHANES - NCHS Research Ethics Review  
391 Board Approval (2019). <https://www.cdc.gov/nchs/nhanes/irba98.htm> [Accessed July 14,  
392 2021].

## Dietary Intake by Diabetic Status

- 393 13. American Diabetes Association. Diagnosis and Classification of Diabetes Mellitus.  
394 Diabetes Care (2014) 37(Supplement\_1):S81 – 90.
- 395 14. Nelson KM, Reiber G, Boyko EJ. Diet and Exercise Among Adults With Type 2 Diabetes:  
396 Findings from the Third National Health and Nutrition Examination Survey (NHANES III).  
397 Diabetes Care (2002) 25(10):1722 – 8.
- 398 15. The United States Census Bureau. How the Census Bureau Measures Poverty (2021).  
399 <https://www.census.gov/topics/income-poverty/poverty/guidance/poverty-measures.html>  
400 [Accessed October 15, 2021].
- 401 16. U.S. Department of Agriculture, Agricultural Research Service. AMPM - USDA  
402 Automated Multiple-Pass Method (2021). [https://www.ars.usda.gov/northeast-](https://www.ars.usda.gov/northeast-area/beltsville-md-bhnrc/beltsville-human-nutrition-research-center/food-surveys-research-group/docs/ampm-usda-automated-multiple-pass-method/#what)  
403 [area/beltsville-md-bhnrc/beltsville-human-nutrition-research-center/food-surveys-research-](https://www.ars.usda.gov/northeast-area/beltsville-md-bhnrc/beltsville-human-nutrition-research-center/food-surveys-research-group/docs/ampm-usda-automated-multiple-pass-method/#what)  
404 [group/docs/ampm-usda-automated-multiple-pass-method/#what](https://www.ars.usda.gov/northeast-area/beltsville-md-bhnrc/beltsville-human-nutrition-research-center/food-surveys-research-group/docs/ampm-usda-automated-multiple-pass-method/#what) [Accessed October 15,  
405 2021].
- 406 17. Centers for Disease Control and Prevention. NHANES Dietary Data (2021).  
407 <https://wwwn.cdc.gov/nchs/nhanes/Search/DataPage.aspx?Component=Dietary> [Accessed  
408 July 14, 2021].
- 409 18. U.S. Department of Agriculture, Agricultural Research Service. USDA Food and Nutrient  
410 Database for Dietary Studies, 5.0. Food Surveys Research Group Home Page (2012).  
411 <http://www.ars.usda.gov/ba/bhnrc/fsrg> [Accessed July 14, 2021].
- 412 19. U.S. Department of Agriculture, Agricultural Research Service. USDA Food and Nutrient  
413 Database for Dietary Studies 2011-2012. Food Surveys Research Group Home Page  
414 (2014). <http://www.ars.usda.gov/ba/bhnrc/fsrg> [Accessed July 14, 2021].
- 415 20. U.S. Department of Agriculture, Agricultural Research Service. USDA Food and Nutrient  
416 Database for Dietary Studies 2013-2014. Food Surveys Research Group Home Page  
417 (2016). <http://www.ars.usda.gov/nea/bhnrc/fsrg> [Accessed July 14, 2021].
- 418 21. U.S. Department of Agriculture, Agricultural Research Service. USDA Food and Nutrient  
419 Database for Dietary Studies 2015-2016. Food Surveys Research Group Home Page  
420 (2018). [https://www.ars.usda.gov/northeast-area/beltsville-md-bhnrc/beltsville-human-](https://www.ars.usda.gov/northeast-area/beltsville-md-bhnrc/beltsville-human-nutrition-research-center/food-surveys-research-group/docs/fndds-download-databases/)  
421 [nutrition-research-center/food-surveys-research-group/docs/fndds-download-databases/](https://www.ars.usda.gov/northeast-area/beltsville-md-bhnrc/beltsville-human-nutrition-research-center/food-surveys-research-group/docs/fndds-download-databases/)  
422 [Accessed July 14, 2021].
- 423 22. U.S. Department of Agriculture, Agricultural Research Service. What We Eat in America  
424 Food Categories 2015-2016 (2021).  
425 [https://www.ars.usda.gov/ARUserFiles/80400530/pdf/1516/Food\\_categories\\_2015-](https://www.ars.usda.gov/ARUserFiles/80400530/pdf/1516/Food_categories_2015-2016.pdf)  
426 [2016.pdf](https://www.ars.usda.gov/ARUserFiles/80400530/pdf/1516/Food_categories_2015-2016.pdf) [Accessed July 14, 2021].
- 427 23. Eicher-Miller HA, Boushey CJ. How Often and How Much? Differences in Dietary Intake  
428 by Frequency and Energy Contribution Vary among U.S. Adults in NHANES 2007 – 2012.  
429 Nutrients. (2017) 9(1):86.

## Dietary Intake by Diabetic Status

- 430 24. Eicher-Miller HA, Boushey CJ, Bailey RL, Yang YJ. Frequently Consumed Foods and  
431 Energy Contributions among Food Secure and Insecure U.S. Children and Adolescents.  
432 *Nutrients*. (2020) 12(2):304.
- 433 25. Hiza HAB, Casavale KO, Guenther PM, Davis CA. Diet Quality of Americans Differs by  
434 Age, Sex, Race/Ethnicity, Income, and Education Level. *J Acad Nutr Diet*. (2013)  
435 113(2):297 – 306.
- 436 26. Forshee RA, Storey ML. Demographics, not beverage consumption, is associated with diet  
437 quality. *Int J Food Sci Nutr*. (2006) 57(7 – 8):494 – 511.
- 438 27. Fung TT, Hu FB, Pereira MA, Liu S, Stampfer MJ, Colditz GA, et al. Whole-grain intake  
439 and the risk of type 2 diabetes: a prospective study in men. *Am J Clin Nutr*. (2002)  
440 76(3):535 – 40.
- 441 28. Clifton P. High-protein and low-glycaemic diets improve dietary compliance and  
442 maintenance of weight loss in overweight adults who have lost weight on a low-calorie diet.  
443 *BMJ Evid-Based Med*. (2011) 16(4):112 – 3.
- 444 29. Westerterp-Plantenga MS, Nieuwenhuizen A, Tomé D, Soenen S, Westerterp KR. Dietary  
445 Protein, Weight Loss, and Weight Maintenance. *Annu Rev Nutr*. (2009) 29(1):21 – 41.
- 446 30. Dias JS. Nutritional Quality and Health Benefits of Vegetables: A Review. *Food Nutr Sci*.  
447 (2012) 3(10):1354 – 74.
- 448 31. Carlos J, Dias J, Imai S. Vegetables Consumption and its Benefits on Diabetes. *J Nutr Ther*.  
449 (2017) 6:1 – 10.
- 450 32. Platel K, Srinivasan K. Plant foods in the management of Diabetes mellitus: Vegetables as  
451 potential hypoglycaemic agents. *Food Nahr*. (1997) 41(2):68 – 74.
- 452 33. Nicklas TA, O'Neil CE. Development of the SoFAS (Solid Fats and Added Sugars)  
453 Concept: The 2010 Dietary Guidelines for Americans. *Adv Nutr*. (2015) 6(3):368S-375S.
- 454 34. U.S. Department of Agriculture and U.S. Department of Health and Human Services.  
455 *Dietary Guidelines for Americans, 2020-2025. 9th Edition* (2020).  
456 <https://DietaryGuidelines.gov> [Accessed July 14, 2021].
- 457 35. Mackenzie T, Brooks B, O'Connor G. Beverage Intake, Diabetes, and Glucose Control of  
458 Adults in America. *Ann Epidemiol*. (2006) 16(9):688 – 91.
- 459 36. Nöthlings U, Boeing H, Maskarinec G, Sluik D, Teucher B, Kaaks R, et al. Food intake of  
460 individuals with and without diabetes across different countries and ethnic groups. *Eur J*  
461 *Clin Nutr*. (2011) 65(5):635 – 41.
- 462 37. Howard AA, Arnsten JH, Gourevitch MN. Effect of Alcohol Consumption on Diabetes  
463 Mellitus. *Ann Intern Med*. (2004) 140(3):211 – 9.

## Dietary Intake by Diabetic Status

- 464 38. Ahmed AT, Karter AJ, Liu J. Alcohol consumption is inversely associated with adherence  
465 to diabetes self-care behaviours. *Diabet Med.* (2006) 23(7):795 – 802.
- 466 39. Malik VS, Popkin BM, Bray GA, Després J-P, Hu FB. Sugar-Sweetened Beverages,  
467 Obesity, Type 2 Diabetes Mellitus, and Cardiovascular Disease Risk. *Circulation.* (2010)  
468 121(11):1356 – 64.
- 469 40. Hess JM, Cifelli CJ, Agarwal S, Fulgoni VL. Comparing the cost of essential nutrients from  
470 different food sources in the American diet using NHANES 2011 – 2014. *Nutr J.* (2019)  
471 18(1):68.
- 472 41. Murphy MM, Scrafford CG, Barraj LM, Bi X, Higgins KA, Jaykus L-A, et al. Potassium  
473 chloride-based replacers: modeling effects on sodium and potassium intakes of the US  
474 population with cross-sectional data from NHANES 2015 – 2016 and 2009 – 2010. *Am J*  
475 *Clin Nutr.* (2021) 114(1):220 – 30.
- 476 42. Slining MM, Popkin BM. Trends in intakes and sources of solid fats and added sugars  
477 among U.S. children and adolescents: 1994 – 2010. *Pediatr Obes.* (2013) 8(4):307 – 24.
- 478 43. Lowden A, Moreno C, Holmbäck U, Lennernäs M, Tucker P. Eating and shift work —  
479 effects on habits, metabolism, and performance. *Scand J Work Environ Health.* (2010)  
480 36(2):150 – 62.
- 481 44. Aqeel M, Forster A, Richards EA, Hennessy E, McGowan B, Bhadra A, et al. The Effect of  
482 Timing of Exercise and Eating on Postprandial Response in Adults: A Systematic Review.  
483 *Nutrients.* (2020) 12(1):221.
- 484 45. Johnston JD. Physiological responses to food intake throughout the day. *Nutr Res Rev.*  
485 (2014) 27(1):107 – 18.
- 486 46. Jacobs DR Jr, Steffen LM. Nutrients, foods, and dietary patterns as exposures in research: a  
487 framework for food synergy. *Am J Clin Nutr.* (2003) 78(3):508S-513S.
- 488 47. Winham DM, Hutchins AM, Thompson SV. Glycemic Response to Black Beans and  
489 Chickpeas as Part of a Rice Meal: A Randomized Cross-Over Trial. *Nutrients.* (2017)  
490 9(10):1095.
- 491 48. Klesges RC, Eck LH, Ray JW. Who underreports dietary intake in a dietary recall?  
492 Evidence from the Second National Health and Nutrition Examination Survey. *J Consult*  
493 *Clin Psychol.* (1995) 63(3):438 – 44.
- 494 49. Freedman LS, Commins JM, Moler JE, Arab L, Baer DJ, Kipnis V, et al. Pooled Results  
495 From 5 Validation Studies of Dietary Self-Report Instruments Using Recovery Biomarkers  
496 for Energy and Protein Intake. *Am J Epidemiol.* (2014) 180(2):172 – 88.

## Dietary Intake by Diabetic Status

- 497 50. Lissner L, Troiano RP, Midthune D, Heitmann BL, Kipnis V, Subar AF, et al. OPEN about  
498 obesity: recovery biomarkers, dietary reporting errors and BMI. *Int J Obes.* (2007)  
499 31(6):956 – 61.
- 500 51. Ocké MC, Larrañaga N, Grioni S, van den Berg SW, Ferrari P, Salvini S, et al. Energy  
501 intake and sources of energy intake in the European Prospective Investigation into Cancer  
502 and Nutrition. *Eur J Clin Nutr.* (2009) 63(4):S3 – 15.
- 503 52. Livingstone MBE, Black AE. Markers of the Validity of Reported Energy Intake. *J Nutr.*  
504 (2003) 133(3):895S-920S.
- 505 53. Salle A, Ryan M, Ritz P. Underreporting of food intake in obese diabetic and nondiabetic  
506 patients. *Diabetes Care.* (2006) 29(12):2726-7.
- 507 54. Gregg EW, Cheng YJ, Narayan KMV, Thompson TJ, Williamson DF. The relative  
508 contributions of different levels of overweight and obesity to the increased prevalence of  
509 diabetes in the United States: 1976 – 2004. *Prev Med.* (2007) 45(5):348 – 52.
- 510 55. Nuttall FQ. Diet and the Diabetic Patient. *Diabetes Care.* (1983) 6(2):11.  
511

Dietary Intake by Diabetic Status

512 **Table 1.** Sociodemographic characteristics of U.S. adults 18 y or older taking insulin, with Type 2 diabetes but not taking insulin, and  
 513 without diabetes as drawn from the NHANES, 2009-2016<sup>1</sup>.

|                         | Insulin takers<br>(n=774) | T2D w/o insulin<br>(n=2,758) | Participants w/o<br>diabetes<br>(n=17,796) | P-value <sup>2</sup> |
|-------------------------|---------------------------|------------------------------|--------------------------------------------|----------------------|
| Sex                     |                           |                              |                                            | 0.0003*              |
| Male                    | 403 (52.1%)               | 1416 (51.3%)                 | 8578 (48.2%)                               |                      |
| Female                  | 371 (47.9%)               | 1342 (48.7%)                 | 9218 (51.8%)                               |                      |
| Age in Years            |                           |                              |                                            | <0.0001*             |
| 18-34                   | 44 (5.6%)                 | 121 (4.4%)                   | 6247 (35.1%)                               |                      |
| 35-49                   | 91 (11.8%)                | 470 (17.0%)                  | 4633 (26.0%)                               |                      |
| 50-80                   | 639 (82.6%)               | 2167 (78.6%)                 | 6916 (38.9%)                               |                      |
| Survey year             |                           |                              |                                            | 0.4                  |
| 2009-2010               | 193 (24.9%)               | 766 (27.8%)                  | 5005 (28.1%)                               |                      |
| 2011-2012               | 181 (23.4%)               | 647 (23.5%)                  | 4168 (23.4%)                               |                      |
| 2013-2014               | 181 (23.4%)               | 660 (23.9%)                  | 4387 (24.7%)                               |                      |
| 2015-2016               | 219 (28.3%)               | 685 (24.8%)                  | 4236 (23.8%)                               |                      |
| Race/Ethnicity          |                           |                              |                                            | <0.0001*             |
| Hispanic                | 205 (27.7%)               | 859 (31.1%)                  | 4448 (25.0%)                               |                      |
| White                   | 276 (35.7%)               | 905 (32.8%)                  | 7517 (42.2%)                               |                      |
| Black                   | 229 (29.6%)               | 692 (25.1%)                  | 3640 (20.5%)                               |                      |
| Other                   | 54 (7.0%)                 | 302 (11.0%)                  | 2191 (12.3%)                               |                      |
| Poverty Income<br>Ratio |                           |                              |                                            | <0.0001*             |
| 0.00-0.99               | 201 (28.1%)               | 623 (25.0%)                  | 3776 (23.2%)                               |                      |
| 1.00-1.99               | 220 (30.7%)               | 748 (30.0%)                  | 4219 (25.9%)                               |                      |
| 2.00-2.99               | 106 (14.8%)               | 384 (15.4%)                  | 2353 (14.4%)                               |                      |
| 3.00-3.99               | 66 (9.2%)                 | 277 (11.1%)                  | 1793 (11.0%)                               |                      |
| 4.00-5.00               | 123 (17.2%)               | 463 (18.5%)                  | 4156 (25.5%)                               |                      |

514 <sup>1</sup> Total numbers do not always add to sample size due to missing values. Percentages do not always add to 100 due to rounding.

515 <sup>2</sup> Rao–Scott modified chi-square p-value is shown. Analyses were adjusted for survey design including stratification and clustering.  
 516 Sample weights were appropriately constructed and applied to this analysis as directed by NCHS. Weights were rescaled so that the  
 517 sum to the weights matched the survey population at the midpoint of the 8 years, 2009–2016. Statistical significance for differences  
 518 among three groups when p < 0.05 is indicated by “\*”.

519

Dietary Intake by Diabetic Status

520 **Table 2.** Top 10 most frequently consumed foods items or beverages<sup>1</sup>, unweighted and weighted frequency of reported foods items or  
 521 beverages, percent of reported foods or beverages, and standard error of percent of reported foods or beverages among all reported  
 522 foods or beverages for U.S. adults 18 y or older taking insulin, with Type 2 diabetes but not taking insulin, and without diabetes drawn  
 523 from 2009–2016 NHANES data.

| Rank  | Insulin takers (n=774)                   |                                   |                        |                           | T2D w/o taking insulin (n=2,758)         |                                   |                        |                           | Participants w/o diabetes (n=17,796)     |                                   |                        |                           |
|-------|------------------------------------------|-----------------------------------|------------------------|---------------------------|------------------------------------------|-----------------------------------|------------------------|---------------------------|------------------------------------------|-----------------------------------|------------------------|---------------------------|
|       | What We Eat In America item <sup>1</sup> | Weighted Frequency <sup>2,3</sup> | Frequency <sup>4</sup> | Wtd % <sup>3,5</sup> (SE) | What We Eat In America item <sup>1</sup> | Weighted Frequency <sup>2,3</sup> | Frequency <sup>4</sup> | Wtd % <sup>3,5</sup> (SE) | What We Eat In America item <sup>1</sup> | Weighted Frequency <sup>2,3</sup> | Frequency <sup>4</sup> | Wtd % <sup>3,5</sup> (SE) |
| Total |                                          | 98,959,094                        | 12,095                 |                           |                                          | 376,469,886                       | 43,421                 |                           |                                          | 3,245,557,852                     | 277,244                |                           |
| 1     | tap water                                | 5,294,037                         | 579                    | 5.3 (0.4)                 | Tap water                                | 20,867,328                        | 2,231                  | 5.5 (0.2)                 | Tap water                                | 202,005,485                       | 15,400                 | 6.2 (0.2)                 |
| 2     | Unsweetened Bottled Water                | 4,341,351                         | 600                    | 4.4 (0.3)                 | Unsweetened bottled water                | 15,815,995                        | 2,157                  | 4.2 (0.3)                 | Unsweetened bottled water                | 114,654,421                       | 11,820                 | 3.5 (0.1)                 |
| 3     | Coffee                                   | 2,867,410                         | 336                    | 2.9 (0.2)                 | Coffee                                   | 10,982,634                        | 1,212                  | 2.9 (0.1)                 | Coffee                                   | 92,688,711                        | 6,906                  | 2.9 (0.1)                 |
| 4     | Tomatoes                                 | 1,583,968                         | 179                    | 1.6 (0.2)                 | Lettuce                                  | 5,520,635                         | 597                    | 1.5 (0.1)                 | White sugar                              | 48,766,824                        | 5,271                  | 1.5 (0.1)                 |
| 5     | 2% reduced fat milk                      | 1,483,662                         | 187                    | 1.5 (0.2)                 | Tomatoes                                 | 5,499,873                         | 598                    | 1.5 (0.1)                 | Lettuce                                  | 45,653,422                        | 3,684                  | 1.4 (0.0)                 |
| 6     | Soft drink (cola type, sugar free)       | 1,367,532                         | 155                    | 1.4 (0.2)                 | 2% reduced fat milk                      | 5,377,691                         | 613                    | 1.4 (0.1)                 | Soft drink (cola-type)                   | 43,801,567                        | 4,172                  | 1.3 (0.1)                 |
| 7     | Lettuce                                  | 1,277,944                         | 156                    | 1.3 (0.1)                 | Soft drink (cola-type, sugar-free)       | 4,446,739                         | 344                    | 1.2 (0.1)                 | Tomatoes                                 | 43,656,646                        | 3,468                  | 1.3 (0.0)                 |
| 8     | Soft drink (cola-type, decaffeinated)    | 867,827                           | 86                     | 0.9 (0.2)                 | White sugar                              | 4,285,836                         | 633                    | 1.1 (0.1)                 | 2% Fat reduced milk                      | 37,409,699                        | 3,298                  | 1.2 (0.0)                 |
| 9     | Sugar substitute (saccharin-based)       | 850,553                           | 124                    | 0.9 (0.1)                 | Banana                                   | 3,928,098                         | 530                    | 1.0 (0.1)                 | Banana                                   | 31,398,643                        | 2,737                  | 1.0 (0.0)                 |

Dietary Intake by Diabetic Status

|    |        |         |     |              |                           |           |     |              |               |            |       |              |
|----|--------|---------|-----|--------------|---------------------------|-----------|-----|--------------|---------------|------------|-------|--------------|
| 10 | Banana | 818,469 | 125 | 0.8<br>(0.1) | Soft drink<br>(cola-type) | 3,726,509 | 460 | 1.0<br>(0.1) | Whole<br>milk | 23,685,000 | 2,338 | 0.7<br>(0.0) |
|----|--------|---------|-----|--------------|---------------------------|-----------|-----|--------------|---------------|------------|-------|--------------|

524

525 <sup>1</sup> 6,772 food or beverage items were reported by participants from NHANES 2009-2016;

526 <sup>2</sup> The sum of the estimated weighted frequencies for all type foods or beverages reported in one day among adult participants  $\geq 18$   
527 years of NHANES 2009–2016;

528 <sup>3</sup> Survey weights and adjustments for the complex survey design were applied to represent the non-institutionalized U.S. population; <sup>4</sup>  
529 The frequency that a food or beverages was reported without sample weights;

530 <sup>5</sup> Derived from the weighted frequency of the individual food or beverage divided by the total weighted frequency of all foods and  
531 beverages (n) reported by whole sample in a single day, where n = 98,959,094 for insulin takers, n = 376,469,886 for T2D w/o taking  
532 insulin, and n = 3,245,557,852 for participants w/o diabetes. Estimated weighted percent has been abbreviated by “Wtd %”; SE stands  
533 for standard error.

534

535

536

537

538

539

540

541

542

543

544

545

546

547

548

549

550

551

552

553

554



Dietary Intake by Diabetic Status

555 **Table 3.** Top 10 most frequently consumed What We Eat in America foods or beverage subcategories<sup>1</sup>, unweighted and weighted  
 556 frequency of reported foods or beverage subcategories, percent of the reported foods or beverage subcategory out of the total, and  
 557 standard error of the percent of reported foods or beverage represented by the subcategory among all reported foods or beverage  
 558 subcategories for U.S. adults 18 y or older taking insulin, with Type 2 diabetes but not taking insulin, and without diabetes drawn from  
 559 2009–2016 NHANES data.  
 560

| Rank  | Insulin takers (n=774)                          |                                   |                        |                            | T2D w/o taking insulin (n=2,758)                |                                   |                        |                            | Participants w/o diabetes (n=17,796)            |                                   |                        |                            |
|-------|-------------------------------------------------|-----------------------------------|------------------------|----------------------------|-------------------------------------------------|-----------------------------------|------------------------|----------------------------|-------------------------------------------------|-----------------------------------|------------------------|----------------------------|
|       | What We Eat In America subcategory <sup>1</sup> | Weighted Frequency <sup>2,3</sup> | Frequency <sup>4</sup> | Wtd % <sup>3,5</sup> (S E) | What We Eat In America subcategory <sup>1</sup> | Weighted Frequency <sup>2,3</sup> | Frequency <sup>4</sup> | Wtd % <sup>3,5</sup> (S E) | What We Eat In America subcategory <sup>1</sup> | Weighted Frequency <sup>2,3</sup> | Frequency <sup>4</sup> | Wtd % <sup>3,5</sup> (S E) |
| Total |                                                 | 98,959,094                        | 12,095                 |                            |                                                 | 376,469,886                       | 43,421                 |                            |                                                 | 3,245,557,852                     | 277,244                |                            |
| 1     | Tap water                                       | 5,356,421                         | 585                    | 5.4 (0.4)                  | Tap water                                       | 21,157,722                        | 2,272                  | 5.6 (0.2)                  | Tap water                                       | 205,305,226                       | 15,673                 | 6.3 (0.2)                  |
| 2     | Coffee                                          | 4,409,221                         | 560                    | 4.5 (0.3)                  | Coffee                                          | 17,061,047                        | 2,097                  | 4.5 (0.1)                  | Coffee                                          | 136,685,004                       | 11,227                 | 4.2 (0.1)                  |
| 3     | Bottled water                                   | 4,341,351                         | 600                    | 4.4 (0.3)                  | Bottled water                                   | 15,815,995                        | 2,157                  | 4.2 (0.3)                  | Bottled water                                   | 114,654,421                       | 11,820                 | 3.5 (0.1)                  |
| 4     | Diet soft drinks                                | 3,718,166                         | 391                    | 3.8 (0.4)                  | Yeast breads                                    | 13,091,450                        | 1,529                  | 3.5 (0.1)                  | Cheese                                          | 95,913,887                        | 7,342                  | 3.0 (0.1)                  |
| 5     | Yeast bread                                     | 3,652,103                         | 449                    | 3.7 (0.2)                  | Cheese                                          | 9,577,396                         | 969                    | 2.5 (0.1)                  | Yeast breads                                    | 95,137,901                        | 8,275                  | 2.9 (0.1)                  |
| 6     | Tea                                             | 2,584,194                         | 293                    | 2.6 (0.3)                  | Tea                                             | 9,519,279                         | 1,070                  | 2.5 (0.2)                  | Soft drinks                                     | 92,330,988                        | 8,918                  | 2.8 (0.1)                  |
| 7     | Cheese                                          | 2,261,411                         | 265                    | 2.3 (0.2)                  | Diet soft drinks                                | 8,358,603                         | 685                    | 2.2 (0.1)                  | Tea                                             | 73,796,069                        | 6,327                  | 2.3 (0.1)                  |
| 8     | Sugar substitutes                               | 2,220,376                         | 326                    | 2.2 (0.3)                  | Soft drinks                                     | 7,651,814                         | 957                    | 2.0 (0.1)                  | Other vegetables and combinations               | 61,835,369                        | 5,004                  | 1.9 (0.0)                  |
| 9     | Eggs and omelets                                | 2,000,524                         | 255                    | 2.0 (0.2)                  | Other vegetables                                | 7,539,753                         | 823                    | 2.0 (0.1)                  | Sugars and honey                                | 60,595,579                        | 6,302                  | 1.9 (0.1)                  |

Dietary Intake by Diabetic Status

|    |                                 |           |     |              |                                   |           |     |              |                                  |            |       |              |
|----|---------------------------------|-----------|-----|--------------|-----------------------------------|-----------|-----|--------------|----------------------------------|------------|-------|--------------|
|    |                                 |           |     |              | and<br>combinati<br>ons           |           |     |              |                                  |            |       |              |
| 10 | Cold cuts<br>and cured<br>meats | 1,973,622 | 222 | 2.0<br>(0.2) | Cream and<br>cream<br>substitutes | 7,361,081 | 858 | 2.0<br>(0.1) | Lettuce<br>and lettuce<br>salads | 60,358,697 | 4,650 | 1.9<br>(0.0) |

561  
562  
563  
564  
565  
566  
567  
568  
569  
570  
571  
572  
573  
574  
575  
576  
577  
578  
579  
580  
581  
582  
583  
584  
585  
586  
587

<sup>1</sup> The What We Eat in America Food Categories were applied to categorize all foods and beverages to 151 subcategories;  
<sup>2</sup> The sum of the estimated weighted frequencies for all type foods or beverages reported in one day among adult participants  $\geq 18$  years of NHANES 2009–2016;  
<sup>3</sup> Survey weights and adjustments for the complex survey design were applied to represent the non-institutionalized U.S. population;  
<sup>4</sup> The frequency that a food or beverages was reported without sample weights;  
<sup>5</sup> Derived from the weighted frequency of the food or beverage subcategories divided by the total weighted frequency of all foods and beverages subcategories (n) reported by whole sample in a single day, where n = 98,959,094 for insulin takers, n = 376,469,886 for T2D w/o taking insulin, and n = 3,245,557,852 for participants w/o diabetes. Estimated weighted percent has been abbreviated by “Wtd %”; SE stands for standard error.

Dietary Intake by Diabetic Status

588 **Table 4.** Top 10 most frequently consumed What We Eat In America food or beverage categories<sup>1</sup>, unweighted and weighted  
 589 frequency of reported food or beverage categories, percent of the reported foods or beverage category out of total, and standard error  
 590 of the percent of reported foods or beverage represented by the category among all reported foods or beverage categories for U.S.  
 591 adults 18 y or older taking insulin, with Type 2 diabetes but not taking insulin, and without diabetes drawn from 2009–2016 NHANES  
 592 data.  
 593

| Rank  | Insulin takers (n=774)                       |                                   |                        |                            | T2D w/o taking insulin (n=2,758)             |                                   |                        |                            | Participants w/o diabetes (n=17,796)         |                                   |                        |                            |
|-------|----------------------------------------------|-----------------------------------|------------------------|----------------------------|----------------------------------------------|-----------------------------------|------------------------|----------------------------|----------------------------------------------|-----------------------------------|------------------------|----------------------------|
|       | What We Eat In America Category <sup>1</sup> | Weighted Frequency <sup>2,3</sup> | Frequency <sup>4</sup> | Wtd % <sup>3,5</sup> (S E) | What We Eat In America Category <sup>1</sup> | Weighted Frequency <sup>2,3</sup> | Frequency <sup>4</sup> | Wtd % <sup>3,5</sup> (S E) | What We Eat In America Category <sup>1</sup> | Weighted Frequency <sup>2,3</sup> | Frequency <sup>4</sup> | Wtd % <sup>3,5</sup> (S E) |
| Total |                                              | 98,578,506                        | 12,039                 |                            |                                              | 374,707,908                       | 43,155                 |                            |                                              | 3,232,070,662                     | 275,796                |                            |
| 1     | Plain water                                  | 9,697,772                         | 1,185                  | 9.8 (0.4)                  | Plain water                                  | 36,973,717                        | 4,429                  | 9.9 (0.3)                  | Plain water                                  | 319,959,647                       | 27,493                 | 9.9 (0.2)                  |
| 2     | Vegetables w/o white potato                  | 9,059,302                         | 982                    | 9.2 (0.6)                  | Vegetables w/o white potato                  | 33,386,898                        | 3,683                  | 8.9 (0.3)                  | Vegetables w/o white potato                  | 274,695,816                       | 22,064                 | 8.5 (0.1)                  |
| 3     | Coffee & tea                                 | 6,993,415                         | 853                    | 7.1 (0.3)                  | Coffee & tea                                 | 26,580,326                        | 3,167                  | 7.1 (0.2)                  | Coffee & tea                                 | 210,481,073                       | 17,554                 | 6.5 (0.1)                  |
| 4     | Fats & oil                                   | 6,975,164                         | 799                    | 7.1 (0.4)                  | Fats & oils                                  | 24,735,148                        | 2,599                  | 6.6 (0.2)                  | Fats & oils                                  | 196,833,742                       | 15,227                 | 6.1 (0.1)                  |
| 5     | Breads, rolls, tortillas                     | 5,814,047                         | 704                    | 5.9 (0.3)                  | Breads, rolls, tortillas                     | 21,868,818                        | 2,632                  | 5.8 (0.1)                  | Breads, rolls, tortillas                     | 161,270,439                       | 14,243                 | 5.0 (0.1)                  |
| 6     | Fruits                                       | 4,539,100                         | 604                    | 4.6 (0.3)                  | Fruits                                       | 17,789,900                        | 2,199                  | 4.7 (0.2)                  | Fruits                                       | 150,617,266                       | 12,803                 | 4.7 (0.1)                  |
| 7     | Diet beverages                               | 4,191,552                         | 449                    | 4.3 (0.4)                  | Condiments and sauces                        | 15,875,817                        | 1,788                  | 4.2 (0.2)                  | Condiments and sauces                        | 148,905,014                       | 12,777                 | 4.6 (0.1)                  |
| 8     | Condiments and sauces                        | 4,117,112                         | 470                    | 4.2 (0.3)                  | Sugars                                       | 14,422,141                        | 1,877                  | 3.8 (0.2)                  | Sweetened beverages                          | 144,772,013                       | 14,108                 | 4.5 (0.1)                  |

Dietary Intake by Diabetic Status

|    |                     |           |     |              |                      |            |       |              |        |             |        |              |
|----|---------------------|-----------|-----|--------------|----------------------|------------|-------|--------------|--------|-------------|--------|--------------|
| 9  | Sugar               | 3,757,238 | 562 | 3.8<br>(0.3) | Milk                 | 13,242,566 | 1,459 | 3.5<br>(0.2) | Sugars | 110,810,638 | 10,222 | 3.4<br>(0.1) |
| 10 | Cured meats/poultry | 3,366,292 | 397 | 3.4<br>(0.3) | Sweet bakery product | 12,011,790 | 1,339 | 3.2<br>(0.1) | Milk   | 103,668,977 | 8,770  | 3.2<br>(0.1) |

594 <sup>1</sup> The What We Eat in America Food Categories were applied to categorize all foods and beverages to 46 categories;  
 595 <sup>2</sup> The sum of the estimated weighted frequencies for all type foods or beverages reported in one day among adult participants  $\geq 18$   
 596 years of NHANES 2009–2016;  
 597 <sup>3</sup> Survey weights and adjustments for the complex survey design were applied to represent the non-institutionalized U.S. population; <sup>4</sup>  
 598 The frequency that a food or beverages was reported without sample weights;  
 599 <sup>5</sup> Derived from the weighted frequency of the food or beverage categories divided by the total weighted frequency of all foods and  
 600 beverages categories (n) reported by whole sample in a single day, where n = 98,578,506 for insulin takers, n = 374,707,908 for T2D  
 601 w/o taking insulin, and n = 3,232,070,662 for participants w/o diabetes. Estimated weighted percent has been abbreviated by  
 602 “Wtd %”; SE stands for standard error.  
 603  
 604  
 605  
 606  
 607  
 608  
 609  
 610  
 611  
 612  
 613  
 614  
 615  
 616  
 617  
 618  
 619  
 620

Dietary Intake by Diabetic Status

621 **Table 5.** Top 10 foods items or beverages contributing the most to total unweighted and weighted energy, percent of the total  
 622 represented by the reported food or beverage item<sup>1</sup>, and standard error of the percent of the total represented by the reported food or  
 623 beverage item among all reported foods or beverage items for U.S. adults 18 y or older taking insulin, with Type 2 diabetes but not  
 624 taking insulin, and without diabetes drawn from 2009–2016 NHANES data.  
 625

| Rank  | Insulin takers (n=774)                   |                                             |                        |                           | T2D w/o taking insulin (n=2,758)         |                                             |                        |                           | Participants w/o diabetes (n=17,796)     |                                             |                        |                           |
|-------|------------------------------------------|---------------------------------------------|------------------------|---------------------------|------------------------------------------|---------------------------------------------|------------------------|---------------------------|------------------------------------------|---------------------------------------------|------------------------|---------------------------|
|       | What We Eat In America item <sup>1</sup> | Weighted Energy Contribution <sup>2,3</sup> | Frequency <sup>4</sup> | Wtd % <sup>3,5</sup> (SE) | What We Eat In America item <sup>1</sup> | Weighted Energy Contribution <sup>2,3</sup> | Frequency <sup>4</sup> | Wtd % <sup>3,5</sup> (SE) | What We Eat In America item <sup>1</sup> | Weighted Energy Contribution <sup>2,3</sup> | Frequency <sup>4</sup> | Wtd % <sup>3,5</sup> (SE) |
| Total |                                          | 11,173,326,140                              | 10,655                 |                           |                                          | 45,994,398,876                              | 38,344                 |                           |                                          | 438,552,576,789                             | 246,981                |                           |
| 1     | 2% reduced fat milk                      | 175,158,078                                 | 187                    | 1.5 (0.3)                 | Soft drink, cola-type                    | 620,925,847                                 | 460                    | 1.4 (0.1)                 | Soft drink, cola-type                    | 7,727,219,654                               | 4,172                  | 1.8 (0.1)                 |
| 2     | Wheat or cracked wheat bread             | 107,505,626                                 | 85                     | 1.0 (0.6)                 | 2% reduced fat milk                      | 542,124,845                                 | 613                    | 1.2 (0.1)                 | Beer (include ale)                       | 7,624,446,189                               | 1,643                  | 1.7 (0.1)                 |
| 3     | Soft white roll                          | 100,546,094                                 | 54                     | 0.9 (0.2)                 | Whole milk                               | 495,105,225                                 | 345                    | 1.1 (0.2)                 | French fries                             | 4,536,464,186                               | 1,608                  | 1.0 (0.0)                 |
| 4     | Regular ice cream (not chocolate)        | 97,758,809                                  | 28                     | 0.9 (0.3)                 | Beer (include ale)                       | 446,611,096                                 | 133                    | 1.0 (0.2)                 | 2% reduced fat milk                      | 4,370,770,940                               | 3,298                  | 1.0 (0.1)                 |
| 5     | White bread                              | 92,313,363                                  | 100                    | 0.8 (0.1)                 | French fries                             | 390,088,888                                 | 171                    | 0.8 (0.1)                 | Beer, lite                               | 4,119,958,979                               | 1,005                  | 0.9 (0.1)                 |
| 6     | Whole wheat bread                        | 88,551,645                                  | 59                     | 0.8 (0.2)                 | Banana                                   | 370,150,703                                 | 530                    | 0.8 (0.1)                 | Ice cream (not                           | 3,839,785,911                               | 1,133                  | 0.9 (0.1)                 |

Dietary Intake by Diabetic Status

|    |                       |            |     |              |                              |             |     |              |                                           |               |       |              |
|----|-----------------------|------------|-----|--------------|------------------------------|-------------|-----|--------------|-------------------------------------------|---------------|-------|--------------|
|    |                       |            |     |              |                              |             |     |              | chocolate)                                |               |       |              |
| 7  | Soft drink, cola-type | 85,779,001 | 77  | 0.8<br>(0.2) | Ice cream (Not chocolate)    | 358,175,595 | 157 | 0.8<br>(0.1) | Banana                                    | 3,167,442,419 | 2,737 | 0.7<br>(0.0) |
| 8  | White potato          | 79,297,997 | 56  | 0.7<br>(0.1) | White bread                  | 339,050,117 | 328 | 0.7<br>(0.1) | Whole milk                                | 3,063,855,299 | 2,338 | 0.7<br>(0.0) |
| 9  | Banana                | 77,782,509 | 125 | 0.7<br>(0.1) | Soft white roll              | 293,239,277 | 242 | 0.6<br>(0.1) | White bread                               | 3,028,693,277 | 1,902 | 0.7<br>(0.0) |
| 10 | Whole milk            | 77,426,678 | 85  | 0.7<br>(0.1) | Wheat or cracked wheat bread | 267,359,710 | 275 | 0.6<br>(0.1) | Soft drink, fruit-flavored, caffeine free | 2,649,165,951 | 2,007 | 0.6<br>(0.0) |

<sup>1</sup> 6,772 food or beverage items were reported by participants from NHANES 2009-2016;

<sup>2</sup> The sum of the estimated weighted energy contribution for all type foods or beverages reported in one day among adult participants  $\geq 18$  years of NHANES 2009–2016;

<sup>3</sup> Survey weights and adjustments for the complex survey design were applied to represent the non-institutionalized U.S. population;

<sup>4</sup> The frequency that a food or beverages was reported without sample weights;

<sup>5</sup> Derived from the weighted energy contribution of the individual food or beverage divided by the total weighted energy contribution of all foods and beverages (n) reported by whole sample in a single day, where n = 11,173,326,140 for insulin takers, n = 45,994,398,876 for T2D w/o taking insulin, and n = 438,552,576,789 for participants w/o diabetes. Estimated weighted percent has been abbreviated by “Wtd %”; SE stands for standard error.

626  
627  
628  
629  
630

Dietary Intake by Diabetic Status

631 **Table 6.** Top 10 highest energy contributing What We Eat in America food and beverage subcategories<sup>1</sup> contributing the most to  
 632 unweighted and weighted energy, percent of the total represented by the reported food or beverage subcategory, and standard error of  
 633 the percent of the total represented by the reported food or beverage subcategory among all reported food or beverage subcategories  
 634 for U.S. adults 18 y or older taking insulin, with Type 2 diabetes but not taking insulin, and without diabetes drawn from 2009–2016  
 635 NHANES data.  
 636

| Rank  | Insulin takers (n=774)                          |                                             |                        |                           | T2D w/o taking insulin (n=2,758)                |                                             |                        |                           | Participants w/o diabetes (n=17,796)            |                                             |                        |                           |
|-------|-------------------------------------------------|---------------------------------------------|------------------------|---------------------------|-------------------------------------------------|---------------------------------------------|------------------------|---------------------------|-------------------------------------------------|---------------------------------------------|------------------------|---------------------------|
|       | What we Eat in America subcategory <sup>1</sup> | Weighted Energy Contribution <sup>2,3</sup> | Frequency <sup>4</sup> | Wtd % <sup>3,5</sup> (SE) | What we Eat in America subcategory <sup>1</sup> | Weighted Energy Contribution <sup>2,3</sup> | Frequency <sup>4</sup> | Wtd % <sup>3,5</sup> (SE) | What we Eat in America subcategory <sup>1</sup> | Weighted Energy Contribution <sup>2,3</sup> | Frequency <sup>4</sup> | Wtd % <sup>3,5</sup> (SE) |
| Total |                                                 | 11,173,326,140                              | 10,655                 |                           |                                                 | 45,994,398,876                              | 38,344                 |                           |                                                 | 438,552,576,789                             | 246,981                |                           |
| 1     | Yeast breads                                    | 542,059,395                                 | 449                    | 4.9 (0.3)                 | Yeast breads                                    | 2,015,776,561                               | 1,529                  | 4.4 (0.2)                 | Pizza                                           | 17,155,217,138                              | 2,325                  | 3.9 (0.2)                 |
| 2     | Pizza                                           | 352,519,439                                 | 74                     | 3.2 (0.6)                 | Pizza                                           | 1,630,091,499                               | 249                    | 3.5 (0.5)                 | Soft drinks                                     | 16,878,162,486                              | 8,918                  | 3.8 (0.1)                 |
| 3     | Chicken, whole pieces                           | 344,627,978                                 | 182                    | 3.1 (0.5)                 | Cakes and pies                                  | 1,406,511,677                               | 386                    | 3.1 (0.3)                 | Yeast breads                                    | 15,025,292,371                              | 8,275                  | 3.4 (0.1)                 |
| 4     | Eggs and omelets                                | 322,535,347                                 | 255                    | 2.9 (0.3)                 | Chicken, whole pieces                           | 1,276,775,627                               | 731                    | 2.8 (0.2)                 | Beer                                            | 12,606,044,121                              | 2,790                  | 2.9 (0.1)                 |
| 5     | Meat mixed dishes                               | 279,742,218                                 | 105                    | 2.5 (0.4)                 | Soft drinks                                     | 1,266,355,047                               | 957                    | 2.8 (0.2)                 | Chicken, whole pieces                           | 11,830,893,925                              | 4,719                  | 2.7 (0.1)                 |
| 6     | Cakes and pies                                  | 258,928,280                                 | 91                     | 2.3 (0.4)                 | Cookies and brownies                            | 1,132,693,357                               | 630                    | 2.5 (0.2)                 | Nuts and seeds                                  | 11,385,283,950                              | 3,925                  | 2.6 (0.1)                 |
| 7     | Cookies and brownies                            | 245,466,831                                 | 185                    | 2.2 (0.2)                 | Nuts and seeds                                  | 1,129,967,899                               | 563                    | 2.5 (0.2)                 | Burritos and tacos                              | 10,936,204,042                              | 1,480                  | 2.5 (0.1)                 |

Dietary Intake by Diabetic Status

|    |                           |             |     |              |                    |               |     |              |                      |                |       |              |
|----|---------------------------|-------------|-----|--------------|--------------------|---------------|-----|--------------|----------------------|----------------|-------|--------------|
| 8  | Cheese                    | 241,035,357 | 265 | 2.2<br>(0.3) | Burritos and tacos | 1,116,149,548 | 203 | 2.4<br>(0.4) | Cookies and brownies | 10,449,344,792 | 4,386 | 2.4<br>(0.1) |
| 9  | Burritos and tacos        | 238,780,285 | 49  | 2.1<br>(0.5) | Eggs and omelets   | 1,062,625,029 | 770 | 2.3<br>(0.1) | Cakes and pies       | 10,399,896,397 | 2,373 | 2.4<br>(0.1) |
| 10 | Cold cuts and cured meats | 218,354,393 | 222 | 2.0<br>(0.4) | Meat mixed dishes  | 980,422,000   | 371 | 2.1<br>(0.2) | Cheese               | 9,908,844,842  | 7,342 | 2.3<br>(0.1) |

637

638

<sup>1</sup> The What We Eat in America Food Categories were applied to categorize all foods and beverages to 151 subcategories;

639

<sup>2</sup> The sum of the estimated weighted energy contribution for all type foods or beverages reported in one day among adult participants  $\geq 18$  years of NHANES 2009–2016;

640

<sup>3</sup> Survey weights and adjustments for the complex survey design were applied to represent the non-institutionalized U.S. population;

641

<sup>4</sup> The frequency that a food or beverages was reported without sample weights;

642

<sup>5</sup> Derived from the weighted energy contribution of the food or beverage subcategories divided by the total weighted energy contribution of all foods and beverages subcategories (n) reported by whole sample in a single day, where n = 11,173,326,140 for insulin takers, n = 45,994,398,876 for T2D w/o taking insulin, and n = 438,552,576,789 for participants w/o diabetes. Estimated weighted percent has been abbreviated by “Wtd %”; SE stands for standard error.

643

644

645

646

647

648

649

650

651

652

653

654

655

656

657

658

659

660

661



Dietary Intake by Diabetic Status

662 **Table 7.** Top 10 highest energy contributing What We Eat in America food and beverage categories<sup>1</sup> contributing the most to  
 663 unweighted and weighted energy, percent of the total represented by the reported food or beverage category, and standard error of the  
 664 percent of the total represented by the reported food or beverage category among all reported food or beverage categories for U.S.  
 665 adults 18 y or older taking insulin, with Type 2 diabetes but not taking insulin, and without diabetes drawn from 2009–2016 NHANES  
 666 data.  
 667

| Rank  | Insulin takers (n=774)                       |                                             |                        |                            | T2D w/o taking insulin (n=2,758)             |                                             |                        |                            | Participants w/o diabetes (n=17,796)         |                                             |                        |                            |
|-------|----------------------------------------------|---------------------------------------------|------------------------|----------------------------|----------------------------------------------|---------------------------------------------|------------------------|----------------------------|----------------------------------------------|---------------------------------------------|------------------------|----------------------------|
|       | What We Eat In America category <sup>1</sup> | Weighted Energy Contribution <sup>2,3</sup> | Frequency <sup>4</sup> | Wtd % <sup>3,5</sup> (S E) | What We Eat In America category <sup>1</sup> | Weighted Energy Contribution <sup>2,3</sup> | Frequency <sup>4</sup> | Wtd % <sup>3,5</sup> (S E) | What We Eat In America category <sup>1</sup> | Weighted Energy Contribution <sup>2,3</sup> | Frequency <sup>4</sup> | Wtd % <sup>3,5</sup> (S E) |
| Total |                                              | 11,067,583,100                              | 10,599                 |                            |                                              | 45,507,634,682                              | 38,078                 |                            |                                              | 434,779,439,791                             | 245,533                |                            |
| 1     | Breads, rolls, tortillas                     | 923,994,769                                 | 704                    | 8.3 (0.4)                  | Breads, rolls, tortillas                     | 3,653,085,399                               | 2,632                  | 8.0 (0.2)                  | Sweet bakery product                         | 27,904,006,131                              | 9,010                  | 6.4 (0.1)                  |
| 2     | Sweet bakery product                         | 629,785,636                                 | 341                    | 5.7 (0.5)                  | Sweet bakery product                         | 3,257,752,964                               | 1,339                  | 7.2 (0.4)                  | Breads, rolls, tortillas                     | 27,497,056,987                              | 14,243                 | 6.3 (0.1)                  |
| 3     | Mixed dishes-sandwiches                      | 550,338,991                                 | 155                    | 5.0 (0.6)                  | Sweetened beverages                          | 2,041,686,370                               | 1,518                  | 4.5 (0.2)                  | Sweetened beverages                          | 26,867,482,295                              | 14,106                 | 6.2 (0.1)                  |
| 4     | Mixed dishes-meat, poultry, seafood          | 487,328,523                                 | 194                    | 4.4 (0.5)                  | Mixed dishes-sandwiches                      | 1,918,027,605                               | 477                    | 4.2 (0.3)                  | Alcoholic beverages                          | 21,928,960,736                              | 5,463                  | 5.0 (0.2)                  |
| 5     | Fats & oils                                  | 449,849,893                                 | 799                    | 4.1 (0.3)                  | Mixed dishes-meat, poultry, seafood          | 1,846,139,541                               | 703                    | 4.1 (0.3)                  | Mixed dishes-sandwiches                      | 18,966,260,477                              | 3,297                  | 4.4 (0.1)                  |

Dietary Intake by Diabetic Status

|    |                             |             |     |              |                                    |                   |       |              |                                    |                    |       |              |
|----|-----------------------------|-------------|-----|--------------|------------------------------------|-------------------|-------|--------------|------------------------------------|--------------------|-------|--------------|
| 6  | Poultry                     | 441,972,521 | 233 | 4.0<br>(0.5) | White<br>potatoes                  | 1,762,408,5<br>54 | 842   | 3.9<br>(0.2) | Mixed<br>dishes-<br>pizza          | 17,155,217,1<br>38 | 2,325 | 3.9<br>(0.2) |
| 7  | Cured<br>meats/poul<br>try  | 427,895,678 | 397 | 3.9<br>(0.4) | Plant<br>based<br>protein<br>foods | 1,711,721,0<br>04 | 1,041 | 3.8<br>(0.2) | Mixed<br>dishes-<br>Mexican        | 16,503,304,1<br>78 | 2,545 | 3.8<br>(0.2) |
| 8  | White<br>potatoes           | 377,782,656 | 216 | 3.4<br>(0.4) | Poultry                            | 1,654,562,1<br>56 | 915   | 3.6<br>(0.2) | Poultry                            | 16,063,883,3<br>80 | 6,066 | 3.7<br>(0.1) |
| 9  | Mixed<br>dishes-<br>Mexican | 362,937,339 | 96  | 3.3<br>(0.6) | Mixed<br>dishes-<br>pizza          | 1,630,091,4<br>99 | 249   | 3.6<br>(0.5) | Plant<br>based<br>protein<br>foods | 15,960,314,7<br>84 | 6,477 | 3.7<br>(0.1) |
| 10 | Sweetened<br>beverages      | 361,977,279 | 336 | 3.3<br>(0.3) | Mixed<br>dishes-<br>Mexican        | 1,602,969,8<br>44 | 361   | 3.5<br>(0.4) | Mixed<br>dishes-<br>grain<br>based | 15,334,421,3<br>26 | 2,991 | 3.5<br>(0.1) |

668

669

670

671

672

673

674

675

676

677

678

679

680

681

682

683

<sup>1</sup> The What We Eat in America Food Categories were applied to categorize all foods and beverages to 46 categories;

<sup>2</sup> The sum of the estimated weighted energy contribution for all type foods or beverages categories reported in one day among adult participants  $\geq 18$  years of NHANES 2009–2016;

<sup>3</sup> Survey weights and adjustments for the complex survey design were applied to represent the non-institutionalized U.S. population;

<sup>4</sup> The frequency that a food or beverages was reported without sample weights;

<sup>5</sup> Derived from the weighted energy contribution of the food or beverage category divided by the total weighted energy contribution of all foods and beverage categories (n) reported by whole sample in a single day, where n = 11,067,583,100 for insulin takers, n = 45,507,634,682 for T2D w/o taking insulin, and n = 434,779,439,791 for participants w/o diabetes. Estimated weighted percent has been abbreviated by “Wtd %”; SE stands for standard error.

Dietary Intake by Diabetic Status

684 **Table 8.** Broad What We Eat In America food and beverage category<sup>1</sup> intake comparisons by frequency and energy among U.S.  
 685 adults 18 y or older taking insulin, with Type 2 diabetes but not taking insulin, and without diabetes drawn from NHANES 2009–  
 686 2016<sup>2</sup>  
 687

| Broad WWEIA food category <sup>1</sup> | Insulin takers (n=774)                    |                                            | T2DM w/o insulin (n=2,758)                |                                            | Participants without diabetes (n=17,796)  |                                            | X <sup>2</sup> P-Value |                     |
|----------------------------------------|-------------------------------------------|--------------------------------------------|-------------------------------------------|--------------------------------------------|-------------------------------------------|--------------------------------------------|------------------------|---------------------|
|                                        | Wtd % <sup>3</sup> of reported foods (SE) | Wtd % <sup>3</sup> of reported energy (SE) | Wtd % <sup>3</sup> of reported foods (SE) | Wtd % <sup>3</sup> of reported energy (SE) | Wtd % <sup>3</sup> of reported foods (SE) | Wtd % <sup>3</sup> of reported energy (SE) | Frequency <sup>4</sup> | Energy <sup>4</sup> |
| Milk/Dairy <sup>5</sup>                | 6.9 (0.4)                                 | 6.9 (0.5)                                  | 7.1 (0.2)                                 | 6.6 (0.3)                                  | 7.4 (0.1)                                 | 6.3 (0.1)                                  | 0.1                    | 0.3                 |
| Protein <sup>6</sup>                   | 11.4 (0.5)                                | 18.8 (1.0)                                 | 11.2 (0.2)                                | 17.2 (0.4)                                 | 10.6 (0.1)                                | 15.7 (0.2)                                 | 0.01                   | <0.0001*            |
| Mixed Dish <sup>7</sup>                | 6.9 (0.4)                                 | 22.2 (1.2)                                 | 6.9 (0.2)                                 | 21.7 (0.6)                                 | 7.5 (0.1)                                 | 22.7 (0.3)                                 | 0.004                  | 0.3                 |
| Grain <sup>8</sup>                     | 9.7 (0.3)                                 | 15.2 (0.6)                                 | 9.6 (0.2)                                 | 14.3 (0.4)                                 | 8.8 (0.1)                                 | 12.1 (0.2)                                 | <0.0001*               | <0.0001*            |
| Snack/Sweet <sup>9</sup>               | 8.5 (0.4)                                 | 13.8 (0.8)                                 | 9.5 (0.2)                                 | 15.4 (0.3)                                 | 10.2 (0.1)                                | 15.1 (0.2)                                 | <0.0001*               | 0.2                 |
| Fruit <sup>10</sup>                    | 4.6 (0.3)                                 | 2.8 (0.2)                                  | 4.7 (0.2)                                 | 2.7 (0.1)                                  | 4.6 (0.1)                                 | 2.5 (0.1)                                  | 0.9                    | 0.05                |
| Vegetable <sup>11</sup>                | 11.0 (0.6)                                | 6.1 (0.5)                                  | 11.0 (0.3)                                | 6.3 (0.2)                                  | 10.4 (0.1)                                | 5.4 (0.1)                                  | 0.1                    | 0.0009*             |

## Dietary Intake by Diabetic Status

|                                            |            |           |            |           |            |           |          |          |
|--------------------------------------------|------------|-----------|------------|-----------|------------|-----------|----------|----------|
| Beverage <sup>12</sup>                     | 14.8 (0.3) | 6.1 (0.4) | 13.9 (0.3) | 7.3 (0.3) | 13.8 (0.1) | 9.5 (0.2) | 0.09     | <0.0001* |
| Alcohol <sup>13</sup>                      | 0.9 (0.2)  | 2.4 (0.5) | 1.2 (0.1)  | 2.9 (0.3) | 2.1 (0.1)  | 5.0 (0.2) | <0.0001* | <0.0001* |
| Water <sup>14</sup>                        | 10.2 (0.4) | 0.0 (0.0) | 10.1 (0.4) | 0.0 (0.0) | 10.2 (0.2) | 0.1 (0.0) | 0.9      | 0.0011*  |
| Fat/Oil <sup>15</sup>                      | 7.1 (0.4)  | 4.0 (0.3) | 6.6 (0.2)  | 3.5 (0.1) | 6.1 (0.1)  | 3.2 (0.1) | 0.002    | 0.003    |
| Cond<br><sup>16</sup> /Sauce <sup>17</sup> | 4.2 (0.3)  | 0.9 (0.1) | 4.2 (0.2)  | 0.9 (0.1) | 4.6 (0.1)  | 1.0 (0.0) | 0.09     | 0.6      |
| Sugars <sup>18</sup>                       | 3.8 (0.3)  | 0.8 (0.1) | 3.8 (0.2)  | 1.1 (0.1) | 3.4 (0.1)  | 1.2 (0.0) | 0.05     | 0.08     |
| Other                                      | 0.2 (0.1)  | 0.1 (0.0) | 0.2 (0.0)  | 0.1 (0.0) | 0.4 (0.0)  | 0.3 (0.0) | 0.006    | <0.0001* |

688

689 <sup>1</sup> The What We Eat in America broad food categories were applied to categorize all foods and beverages reported in a single day to 14  
690 broad food groups;

691 <sup>2</sup> Survey weights and adjustments for the complex survey design were applied to represent the non-institutionalized U.S. population.  
692 Total numbers and percentages do not always add up to sample size due to missing values and rounding;

693 <sup>3</sup> Wtd % stands for the estimated weighted percent of all reports of foods or beverages or energy from reported foods or beverages  
694 reported in a single day that are included in a food group;

695 <sup>4</sup> p-values were calculated using the Rao – Scott modified chi-square statistic; “\*” indicates  $p < 0.05/42$  or  $p < 0.0012$  using a  
696 Bonferroni type adjustment for multiple comparisons for food group intake among 14 broad food categories  $\times$  3 groups;

697 <sup>5</sup> Milk, flavored milk, dairy drinks and substitutes, cheese and yogurt;

698 <sup>6</sup> Meats, poultry, seafood, eggs, cured meats/poultry, and plant-based protein foods;

699 <sup>7</sup> Mixed dishes containing meat, poultry seafood; grain-based; Asian; Mexican; pizza; sandwiches, and soups;

## Dietary Intake by Diabetic Status

- 700 <sup>8</sup> Cooked grains, breads, rolls, tortillas, quick breads and bread products, ready-to-eat cereals, and cooked cereals;
- 701 <sup>9</sup> Savory snacks, crackers, snack/meal bars, sweet bakery products, candy and other desserts;
- 702 <sup>10</sup> Fresh fruits, dried fruits, and fruit salads;
- 703 <sup>11</sup> Vegetables and white potatoes;
- 704 <sup>12</sup> 100% juice, diet beverages, sweetened beverages, coffee and tea;
- 705 <sup>13</sup> Beer, wine, liquor and cocktails;
- 706 <sup>14</sup> Plain water and flavored or enhanced water;
- 707 <sup>15</sup> Butter and animal fats, margarine, cream cheeses, cream, mayonnaise, salad dressings and vegetable oils;
- 708 <sup>16</sup> Condiment;
- 709 <sup>17</sup> Tomato-based, soy-based, mustard, olives, pickled vegetables, pasta sauces, dips, gravies, and other sauces;
- 710 <sup>18</sup> Sugars, honey, jams, syrups, and toppings
